# Supplementary material for: Genetic and clinical analyses of psychosis spectrum symptoms in a large multiethnic youth cohort reveal significant link with ADHD
Source: PubMed Central journal article supplement (PMC7844241; doi:10.1038/s41398-021-01203-2), 2021-01-28

## **Supplementary Figures**

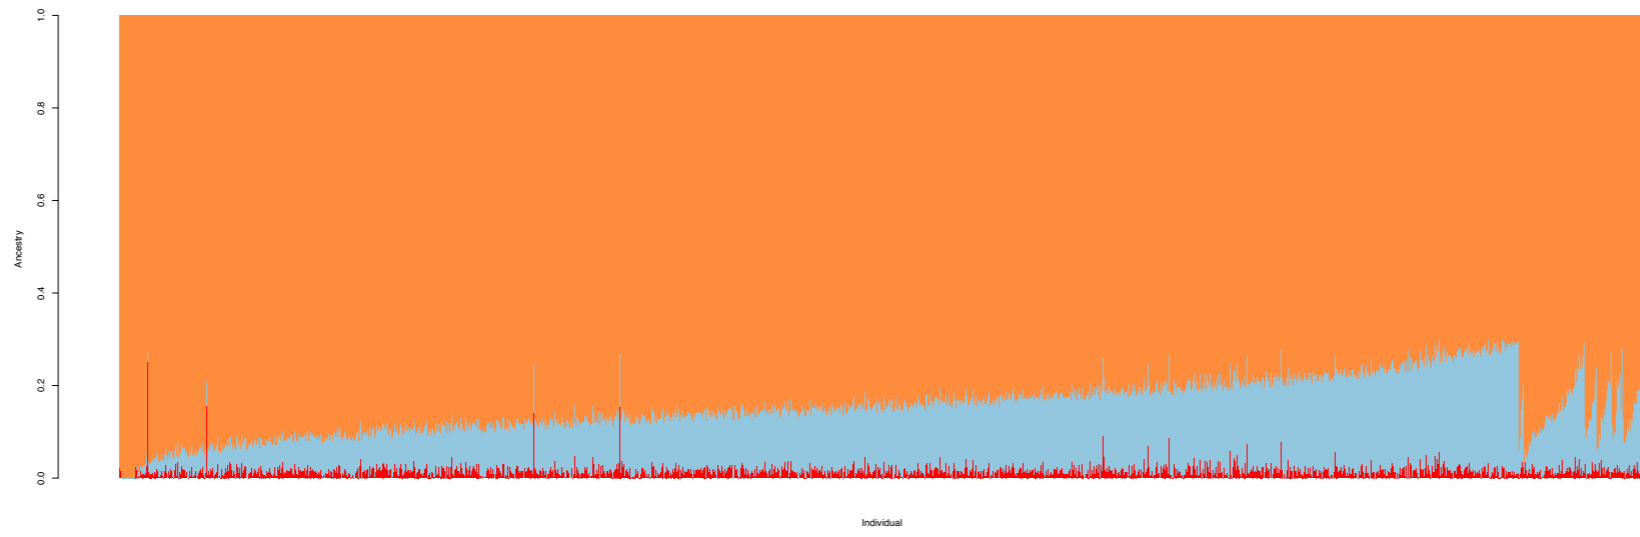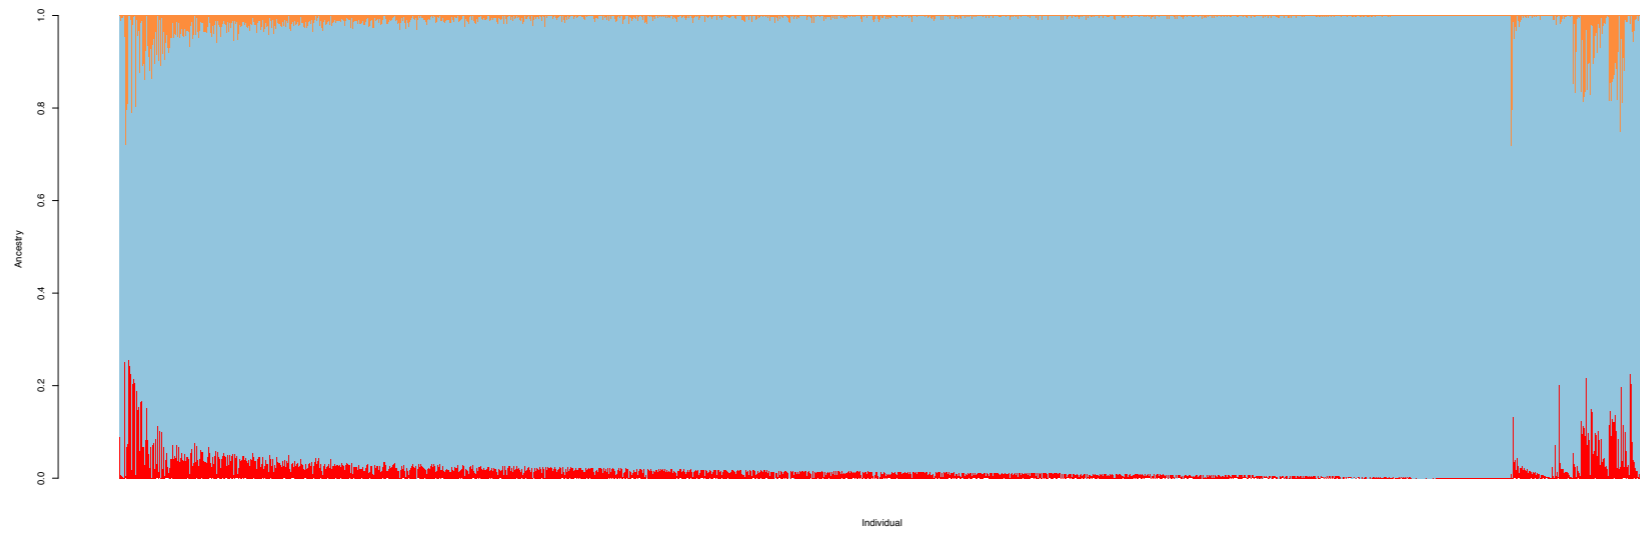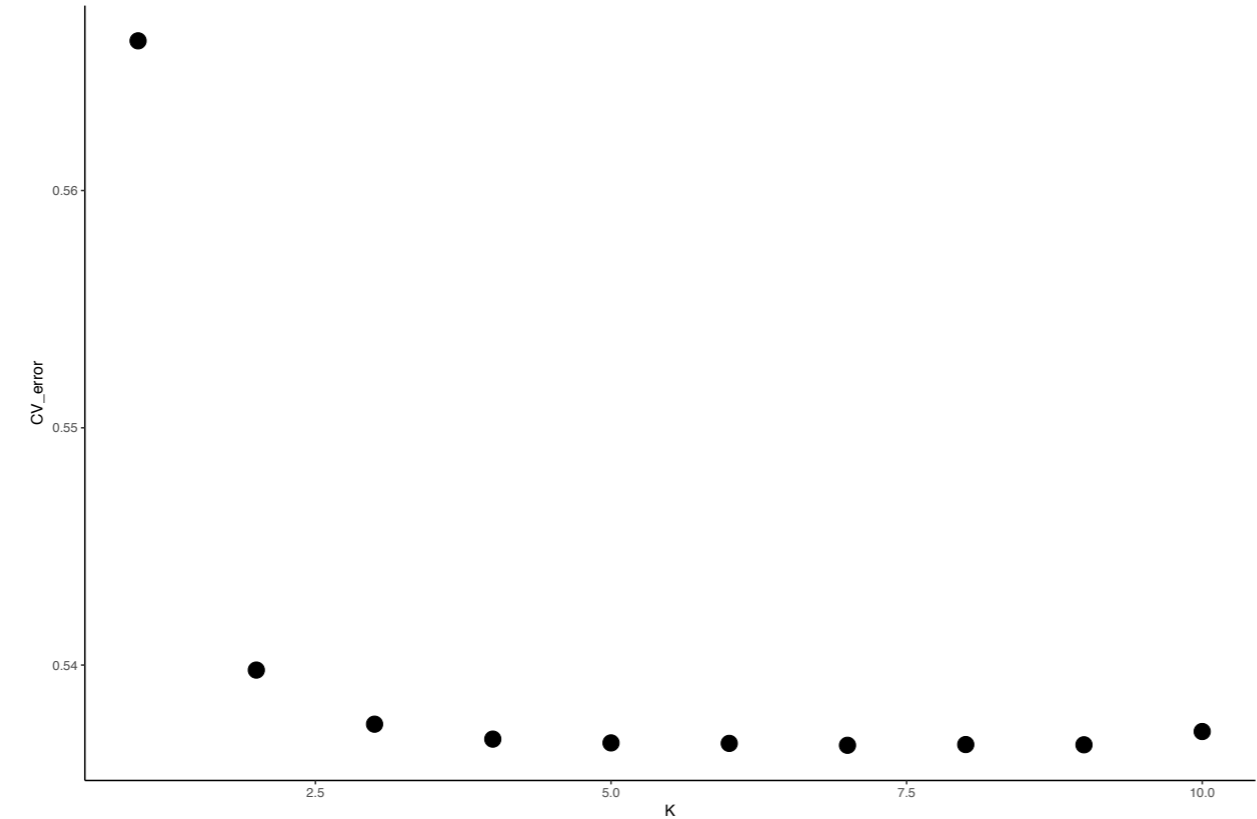

**S Fig 1**

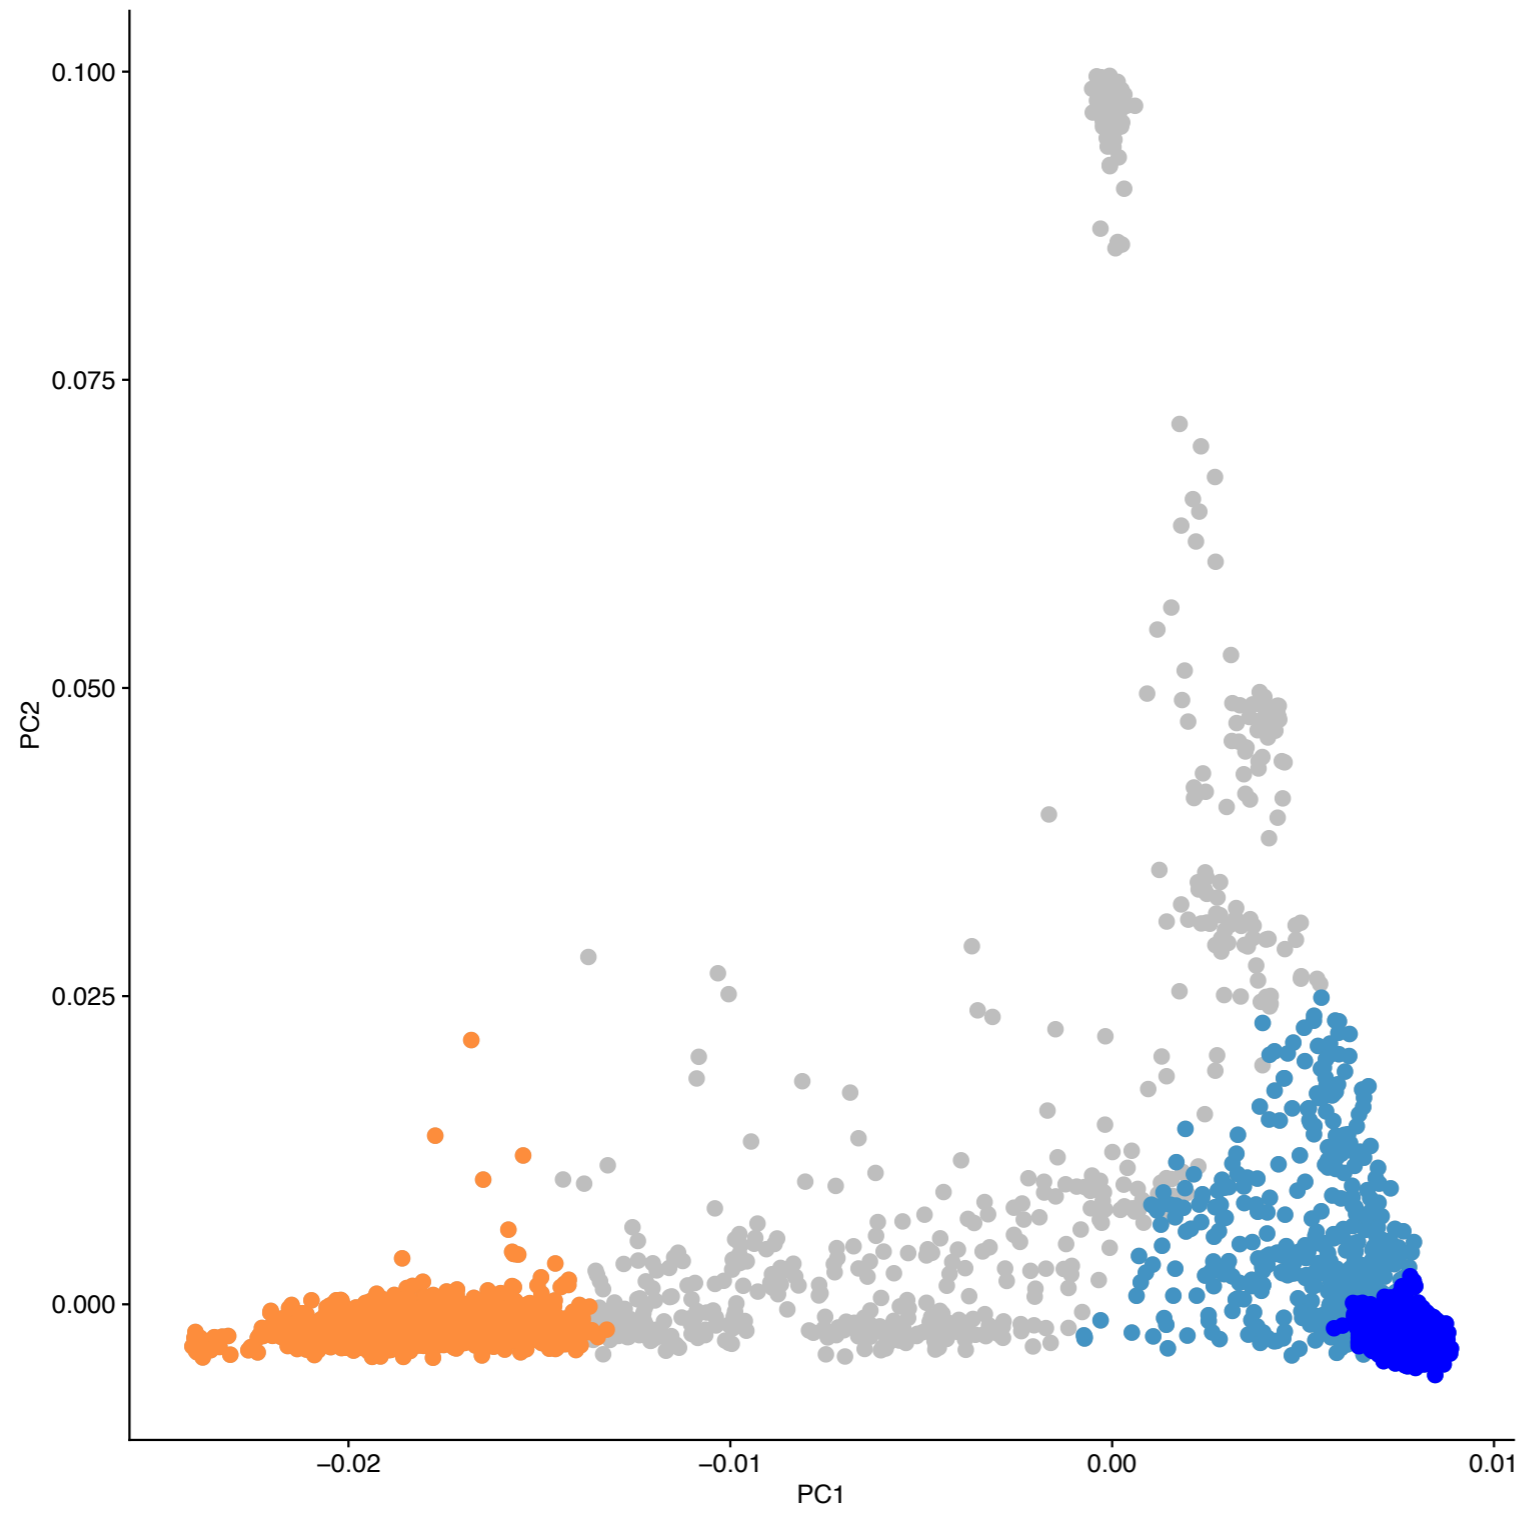

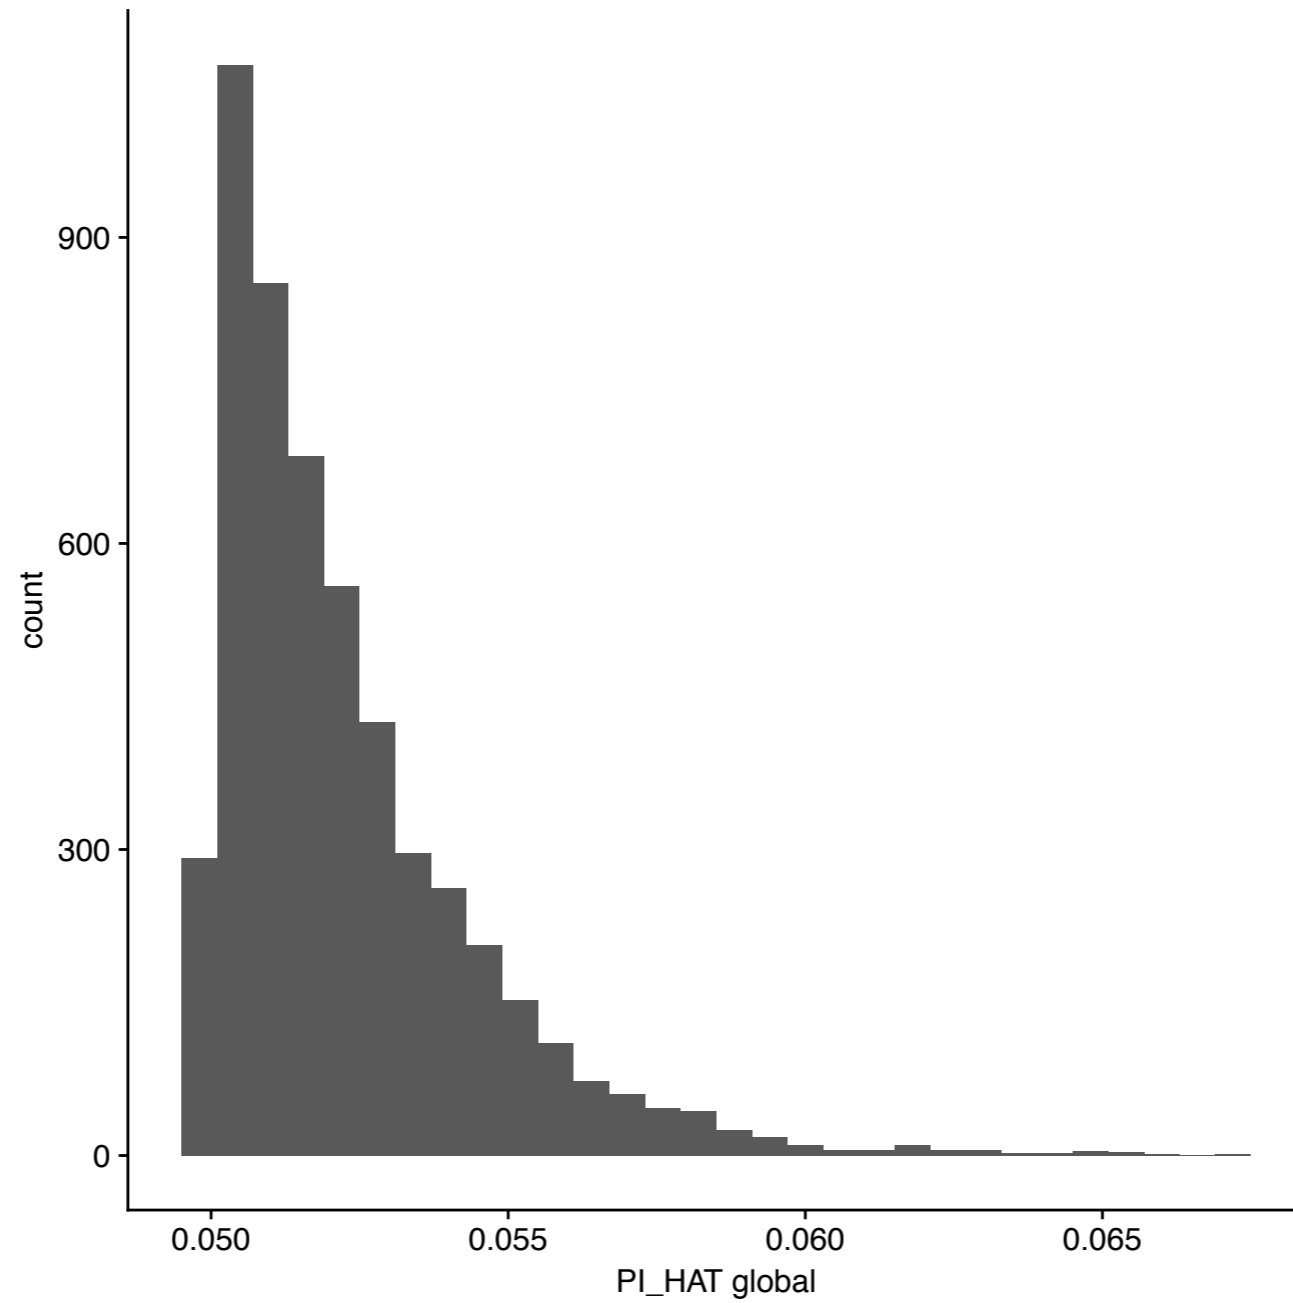

Identity by state estimates  $>0.05$  between EA and AA pairs estimated from a global analyses that were not identified in within-ancestry analyses. Nearly all pairs (~98%) were AA pairs.

# Actual data

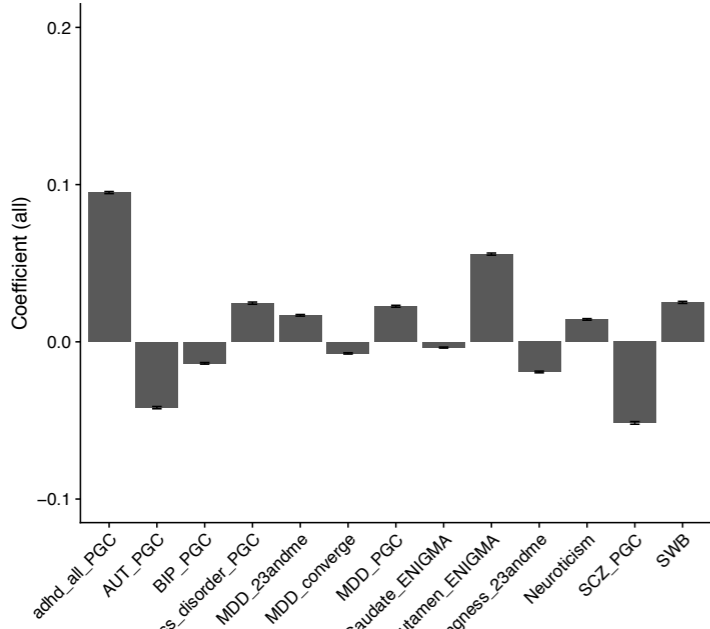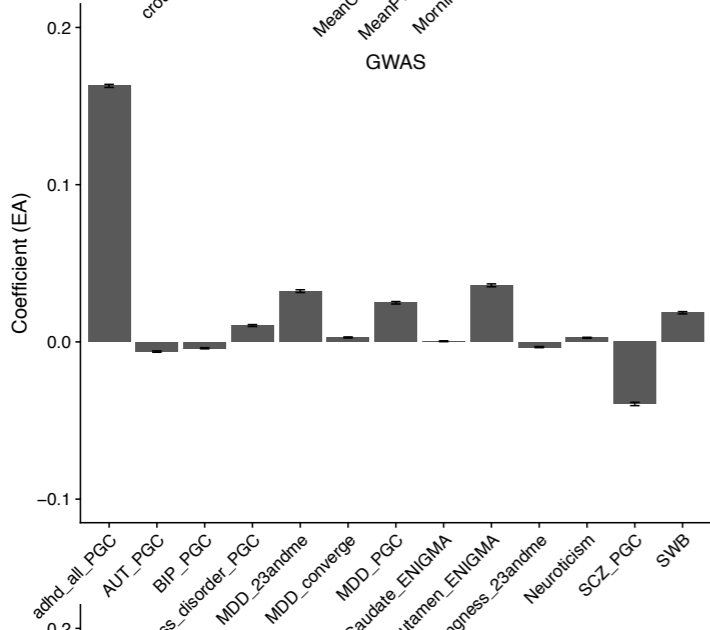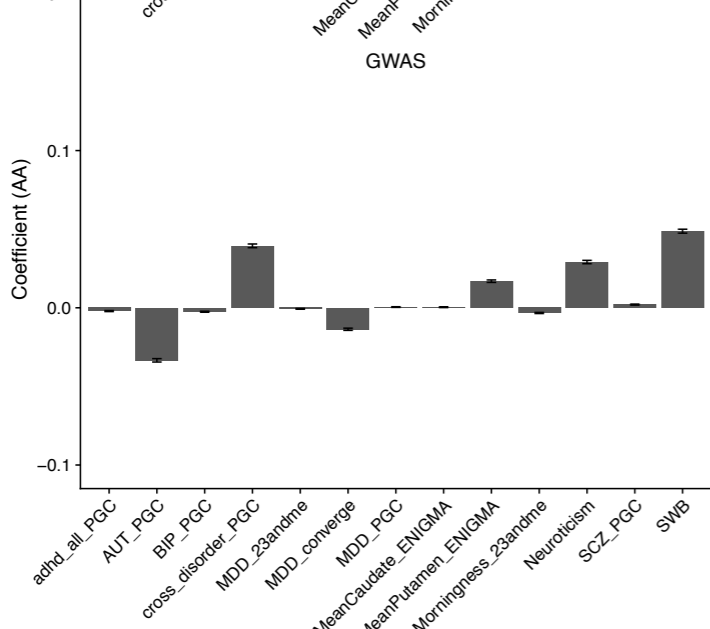

# Permuted data

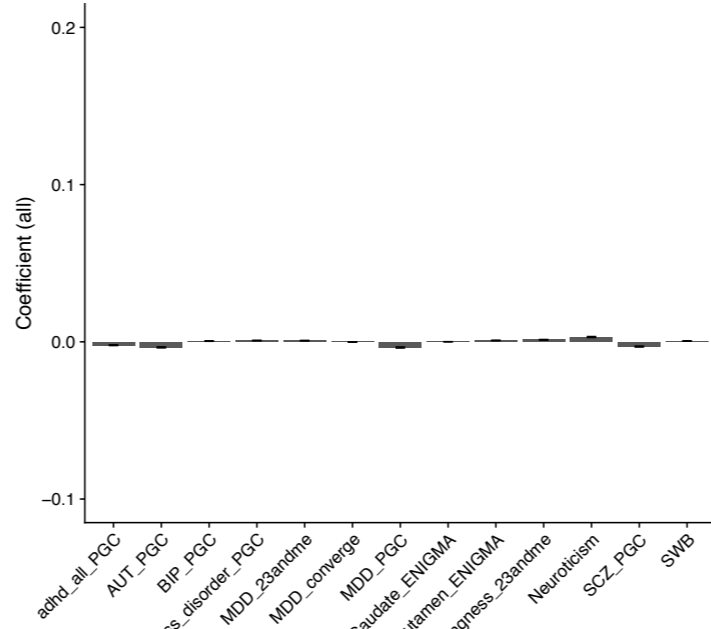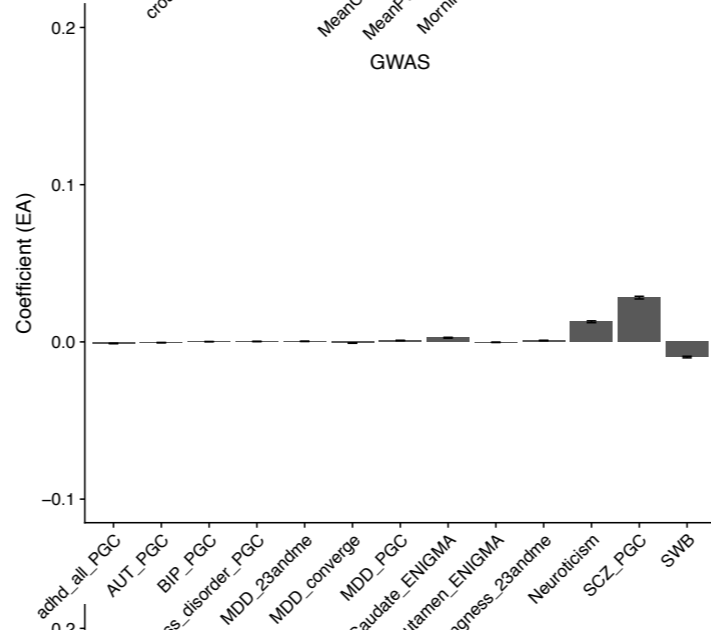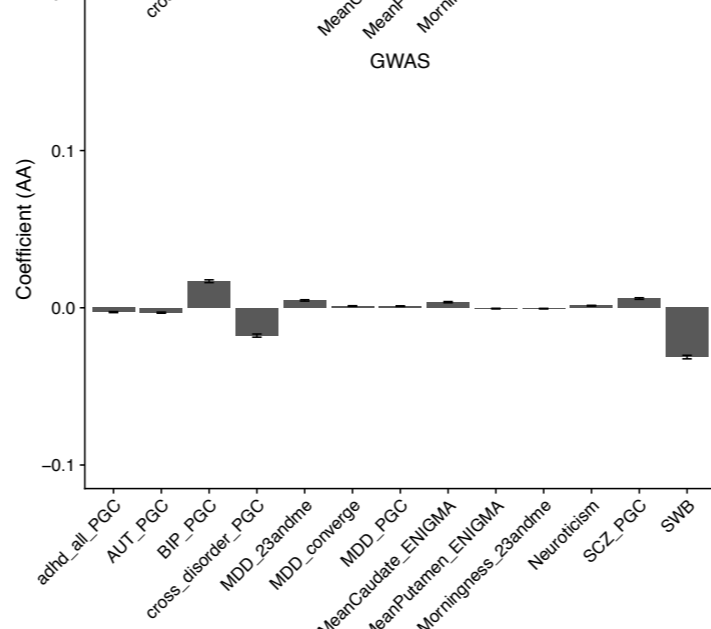

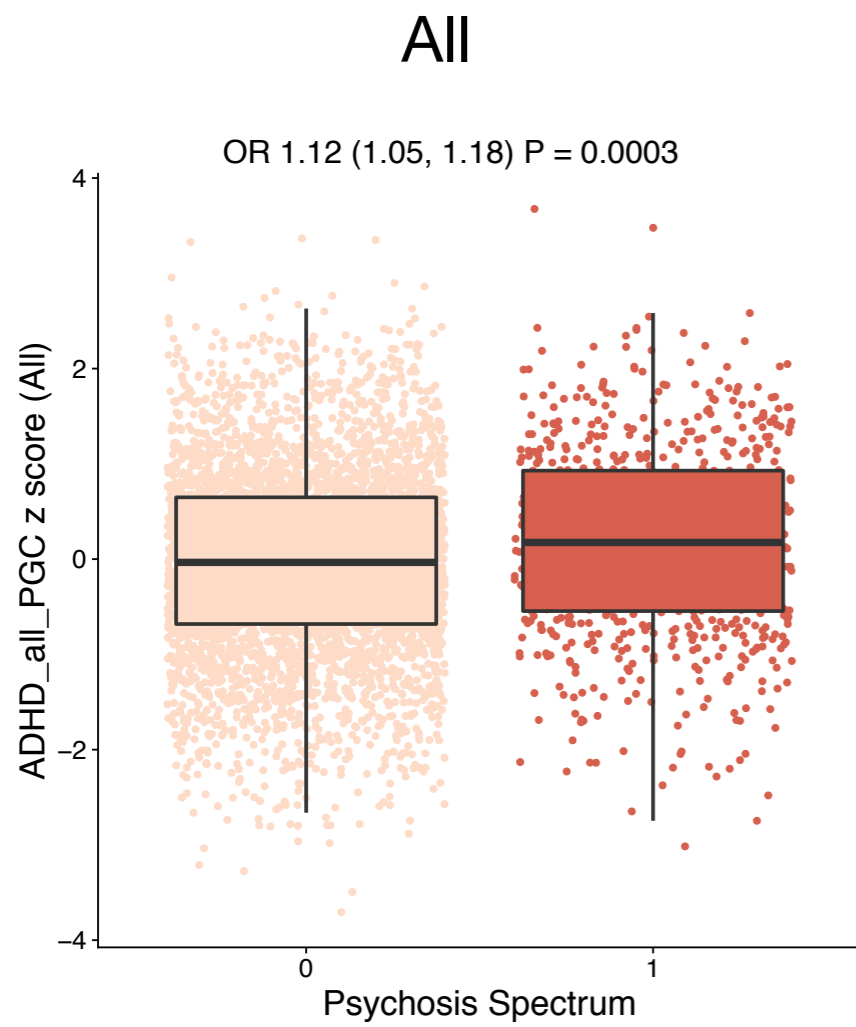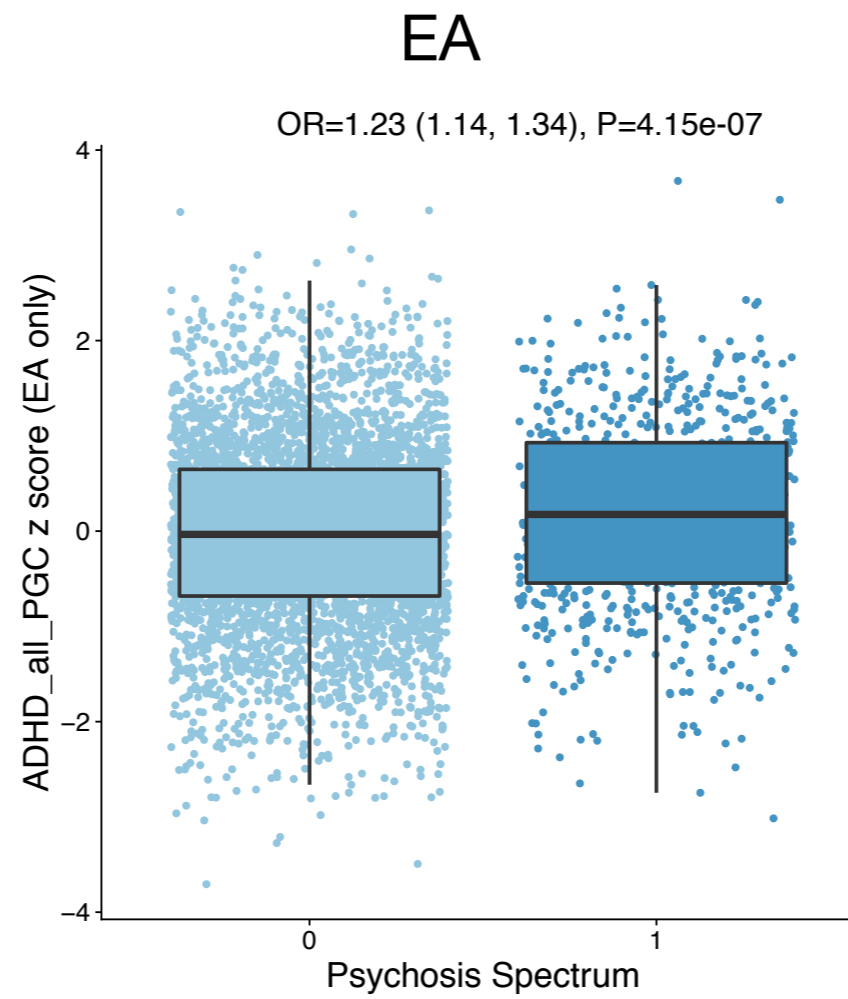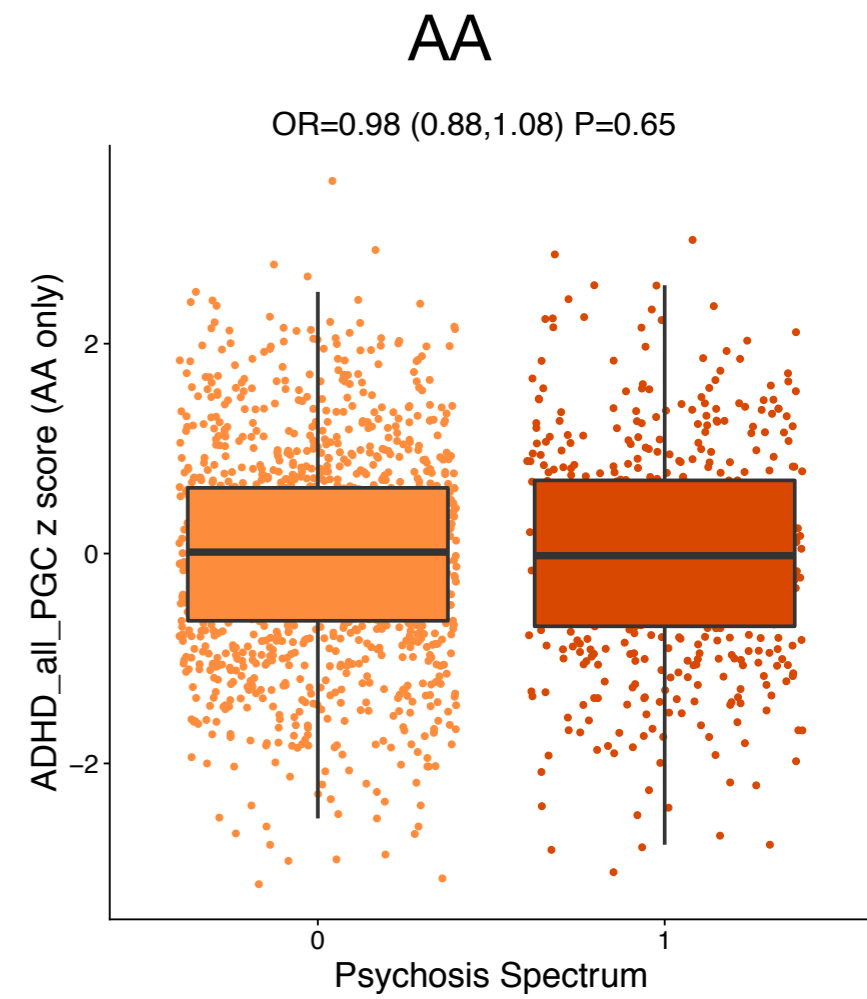

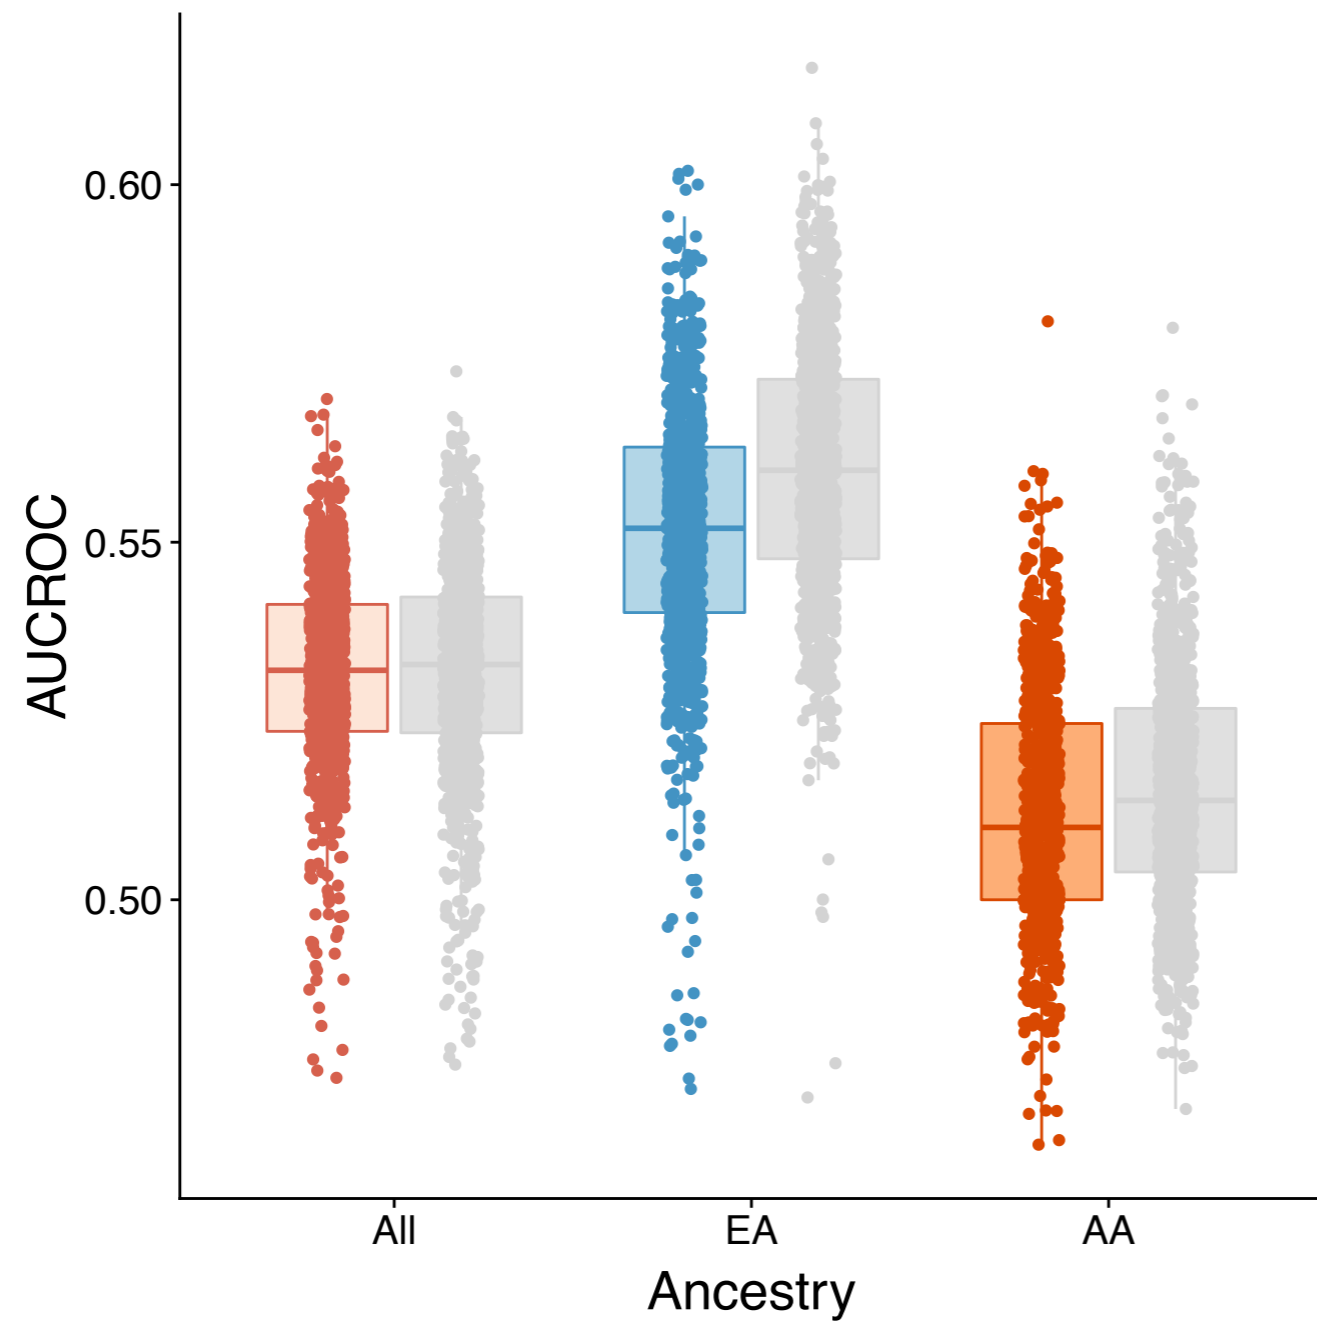

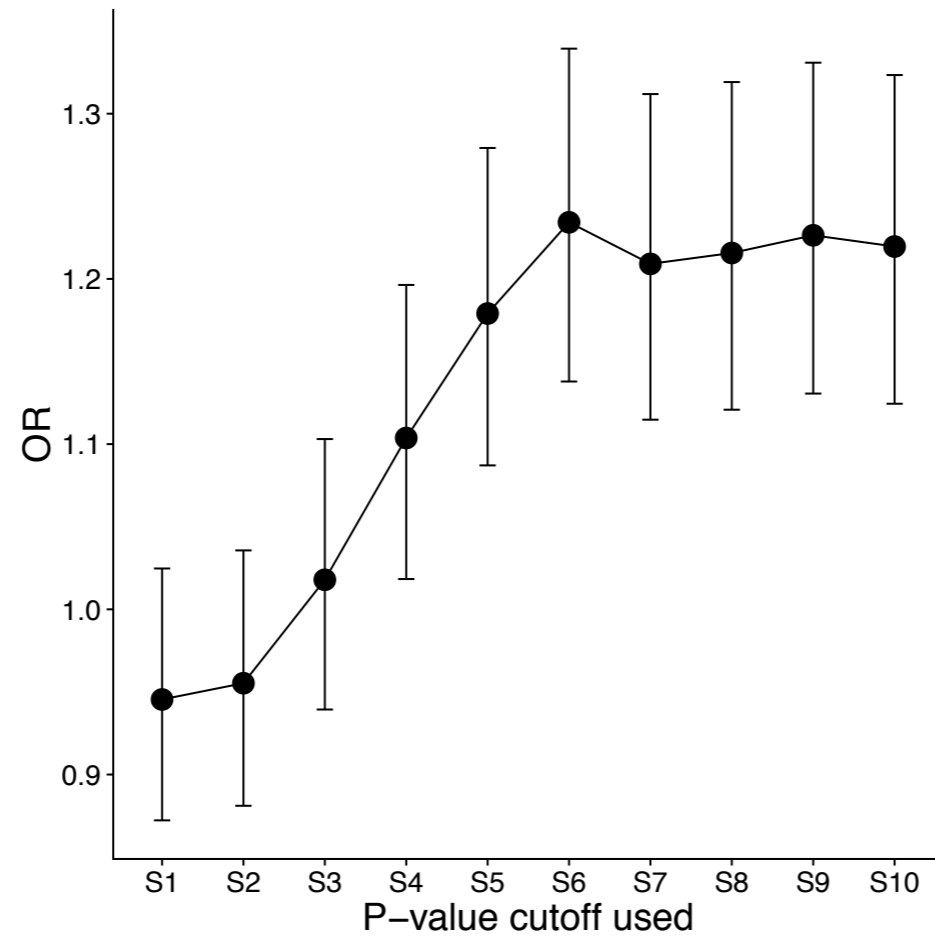



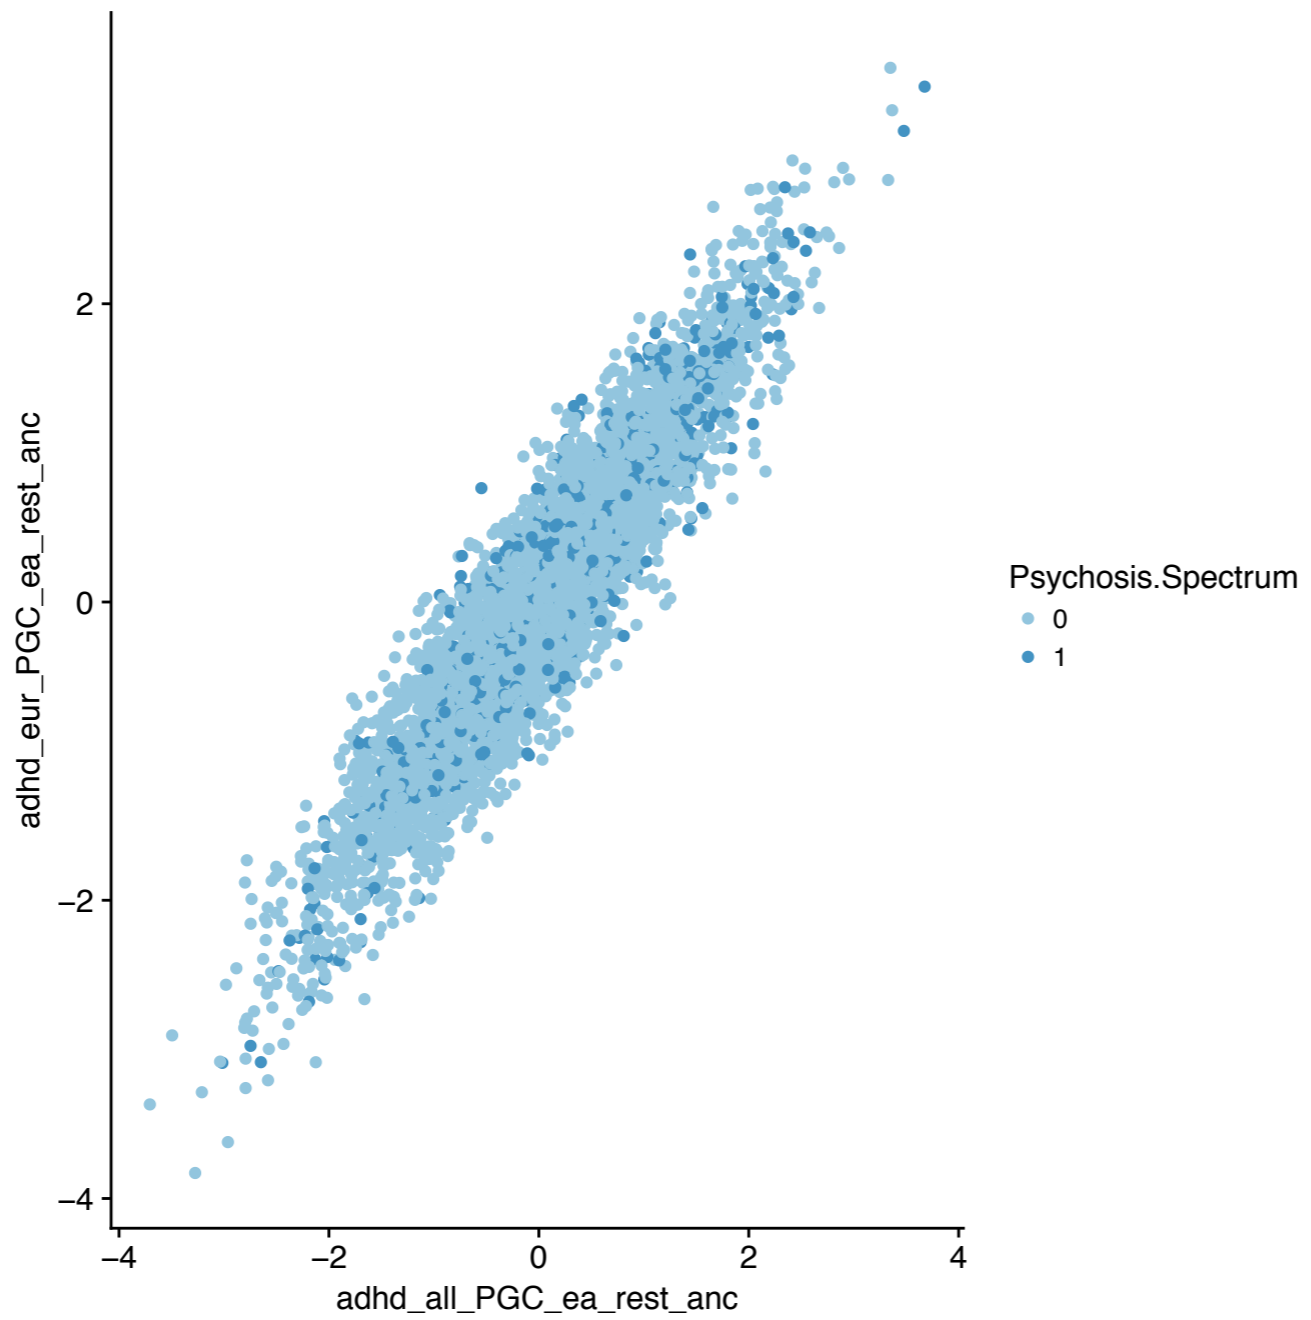

# EA

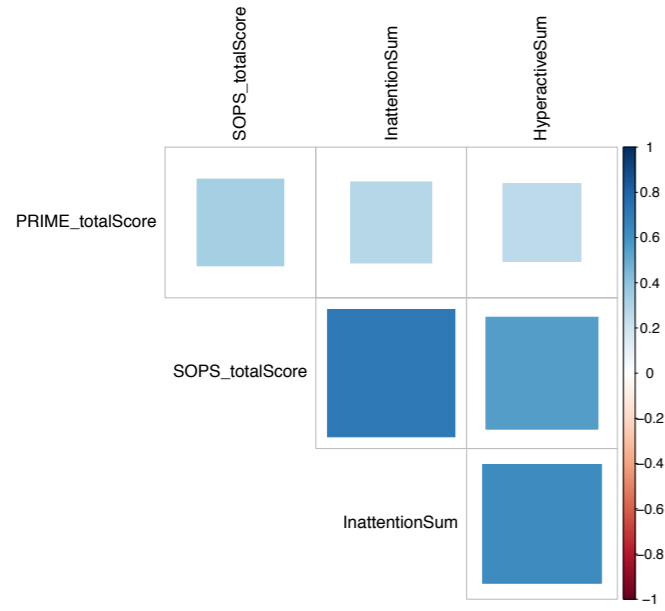

# AA

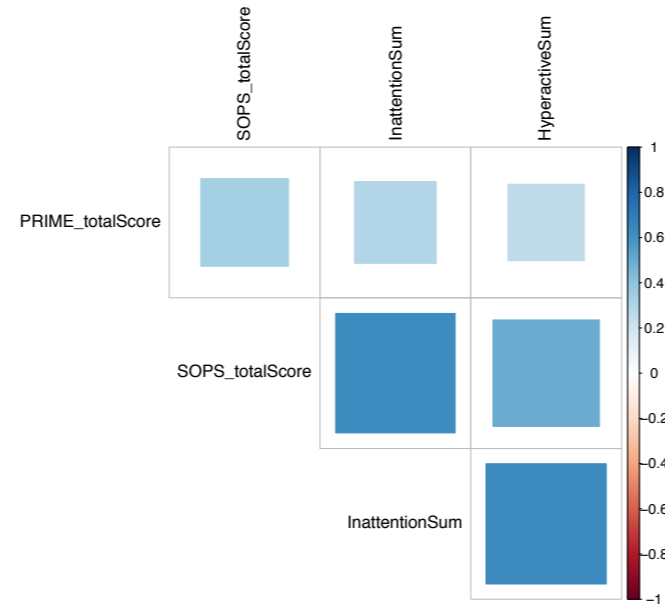

# AII

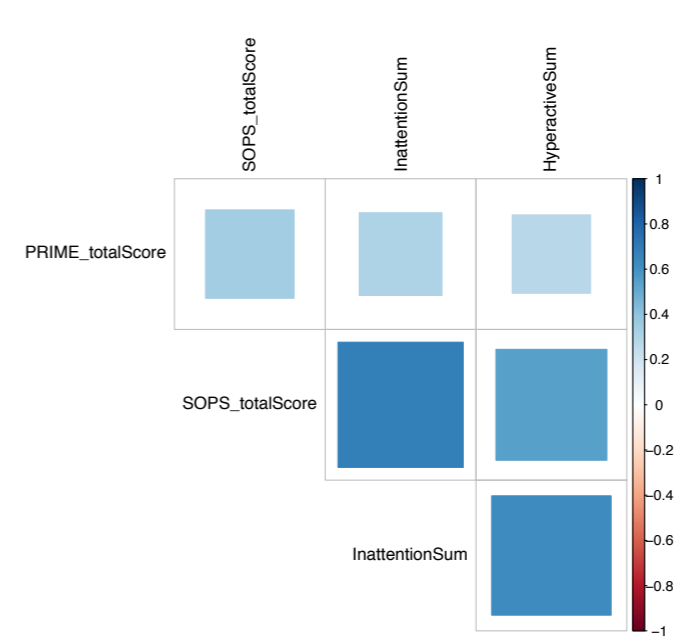

# EA

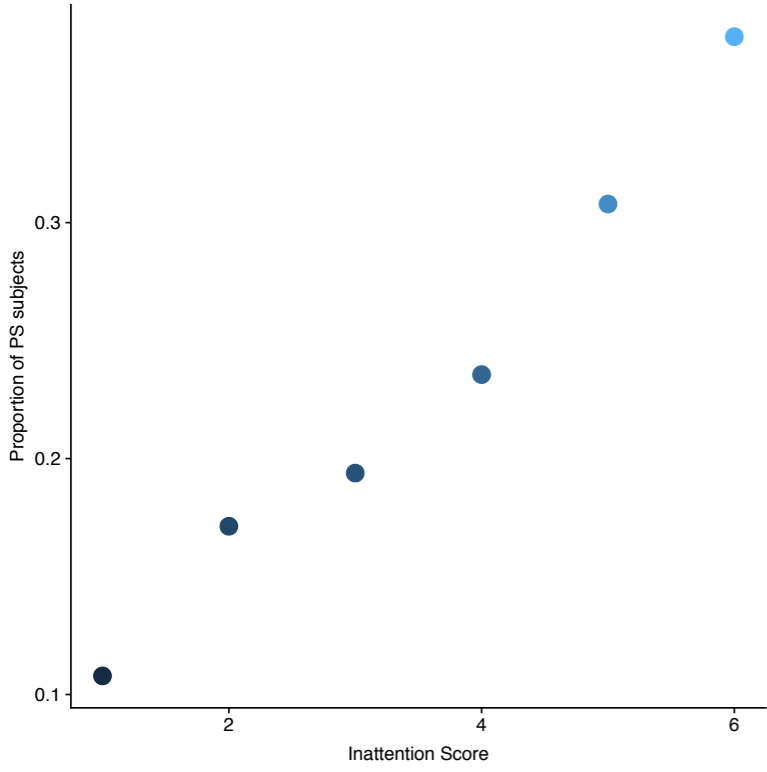

# AA

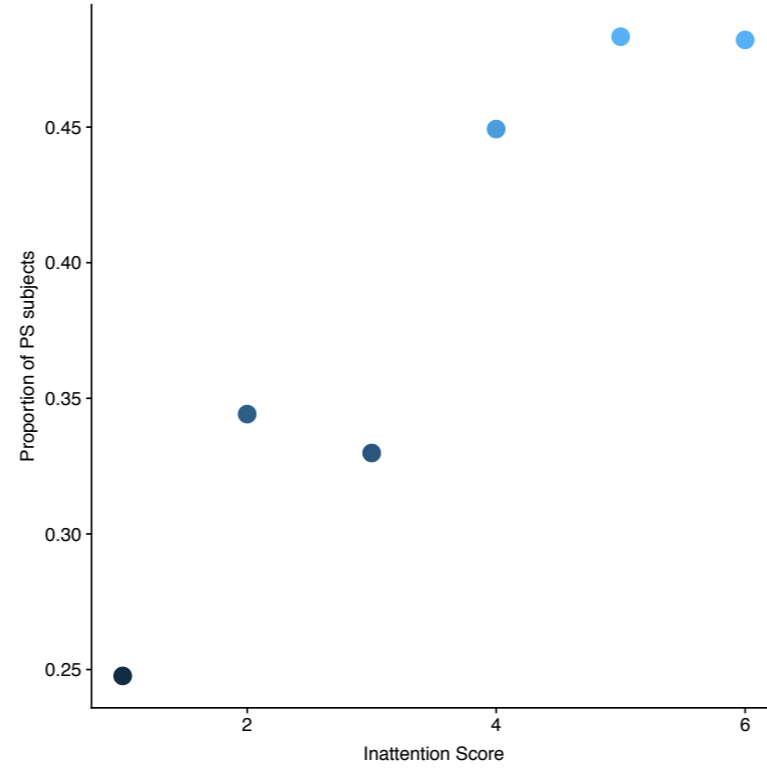

# All

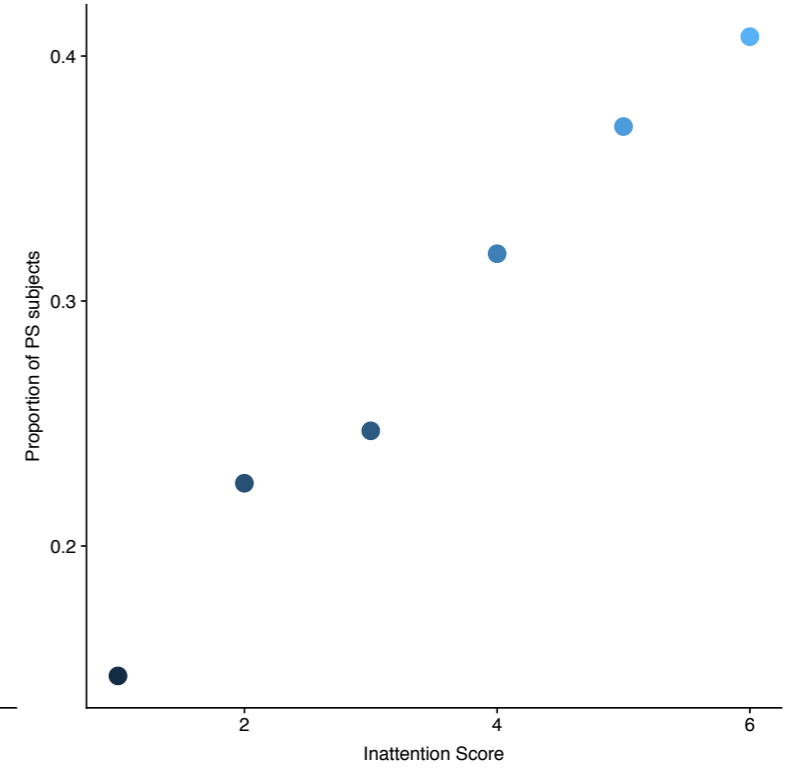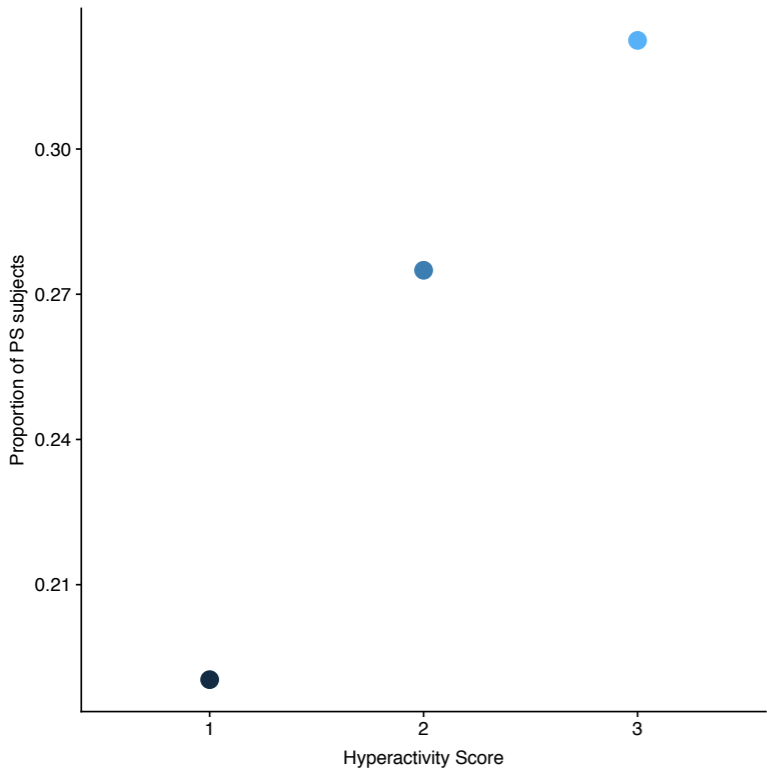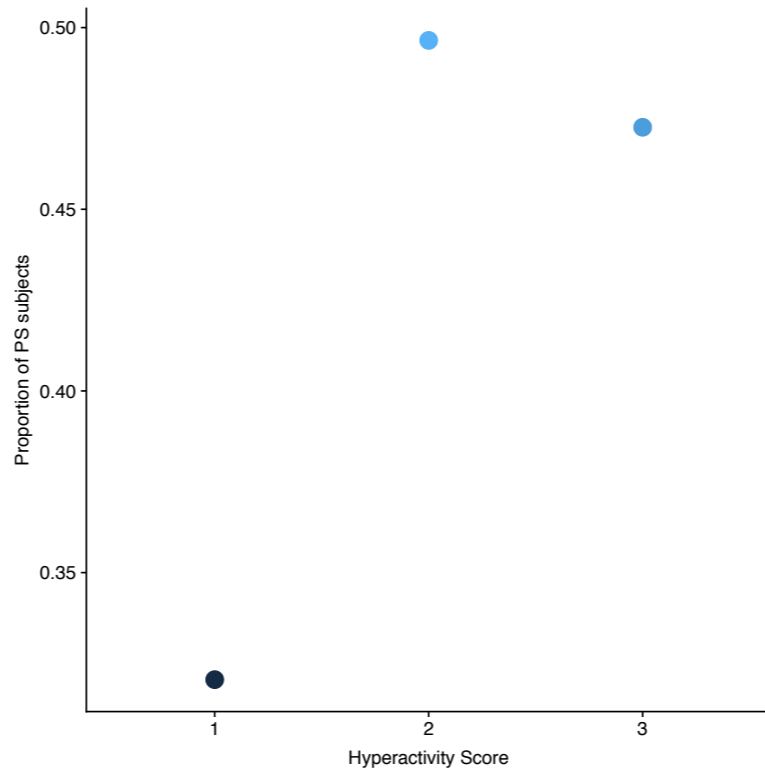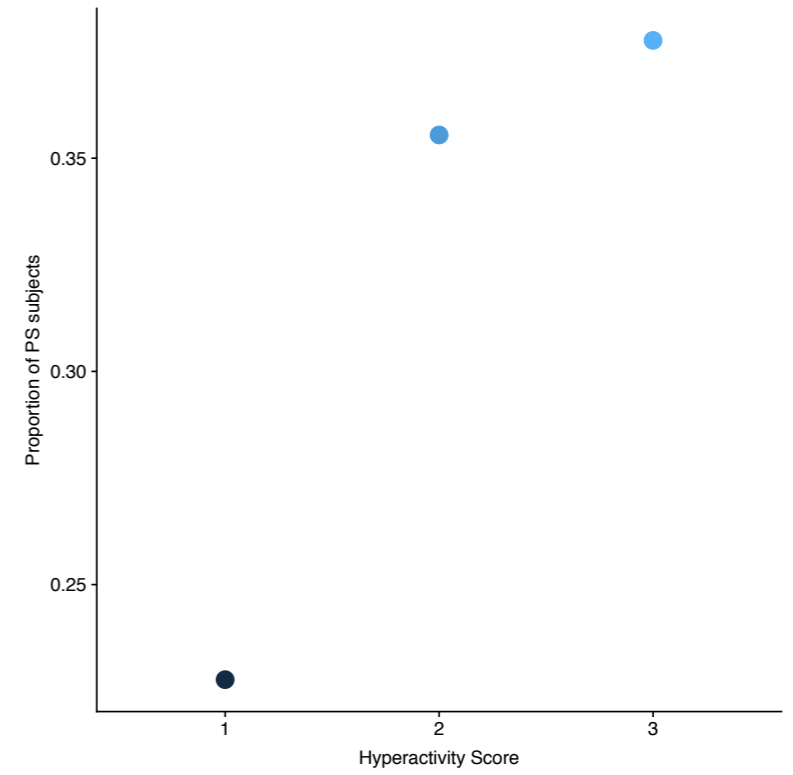

# EA

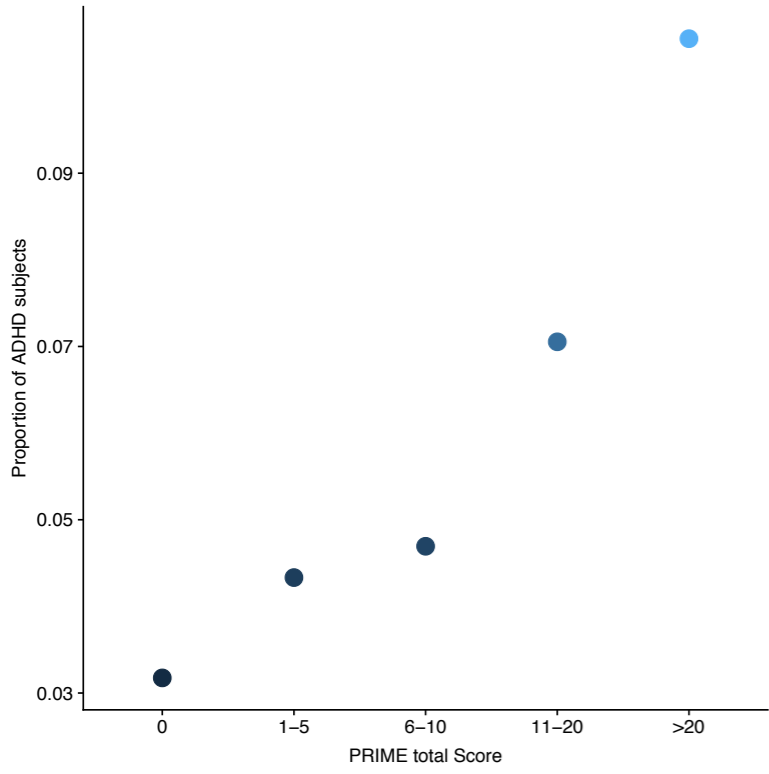

# AA

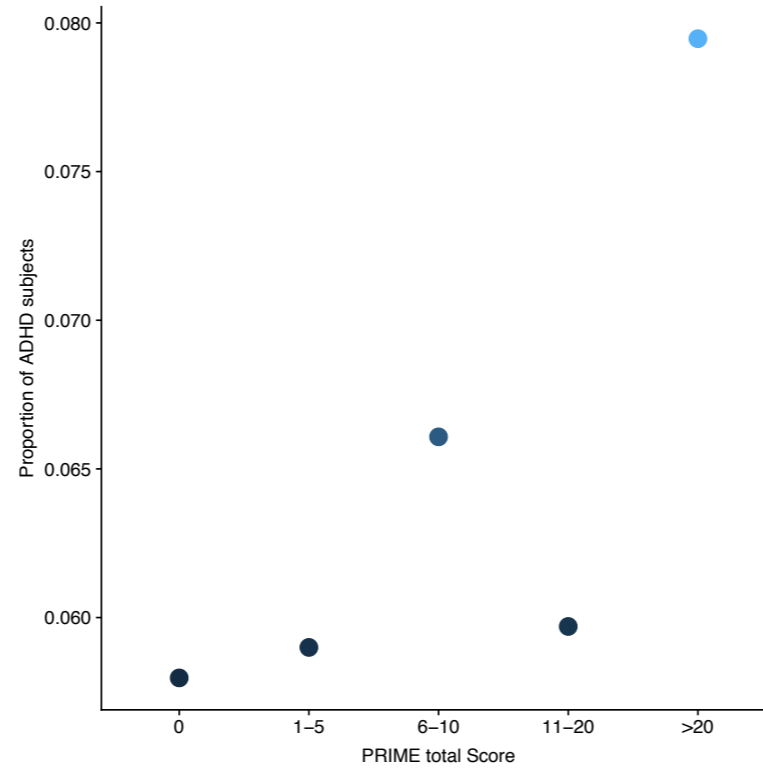

# All

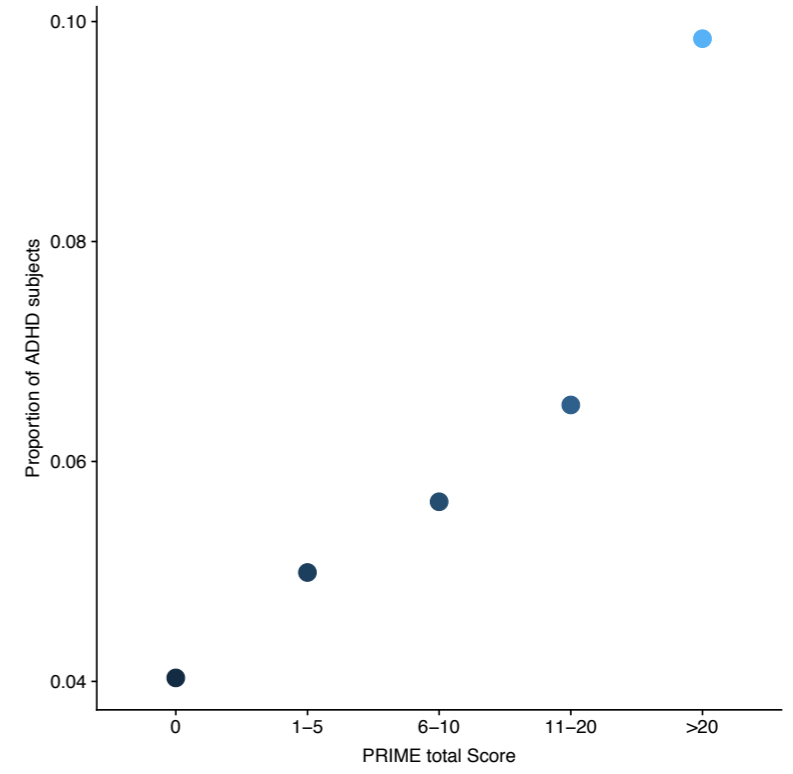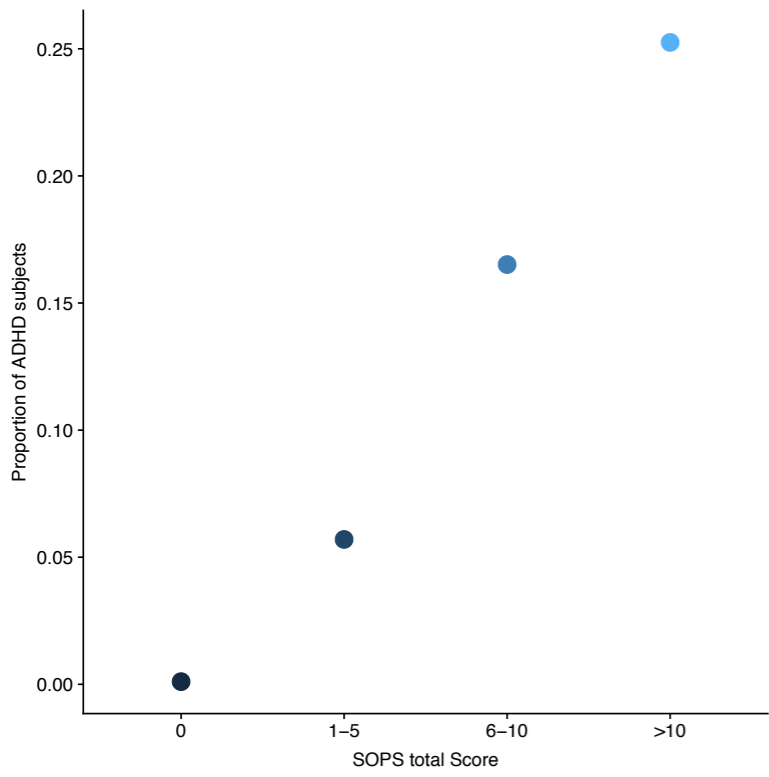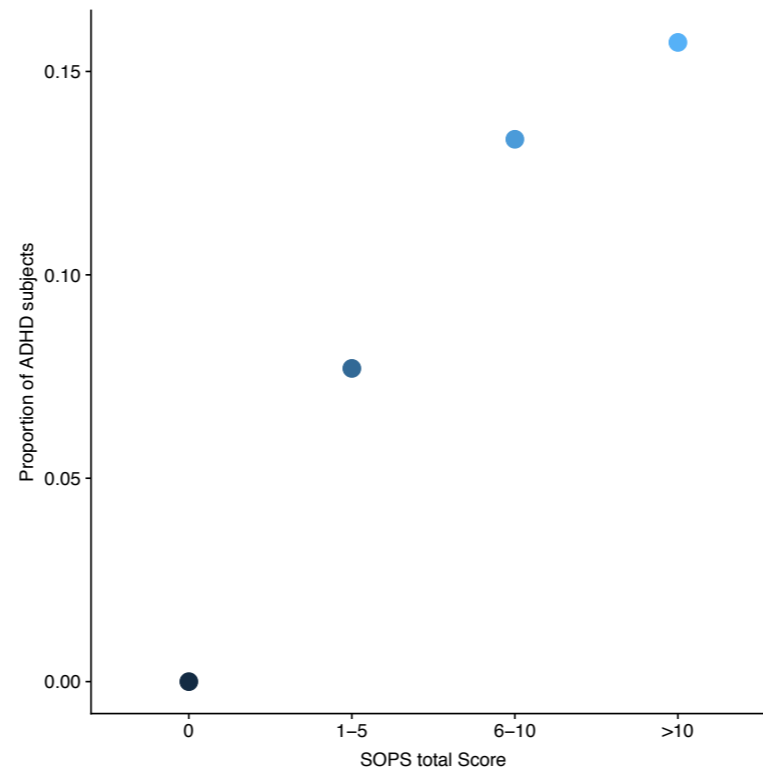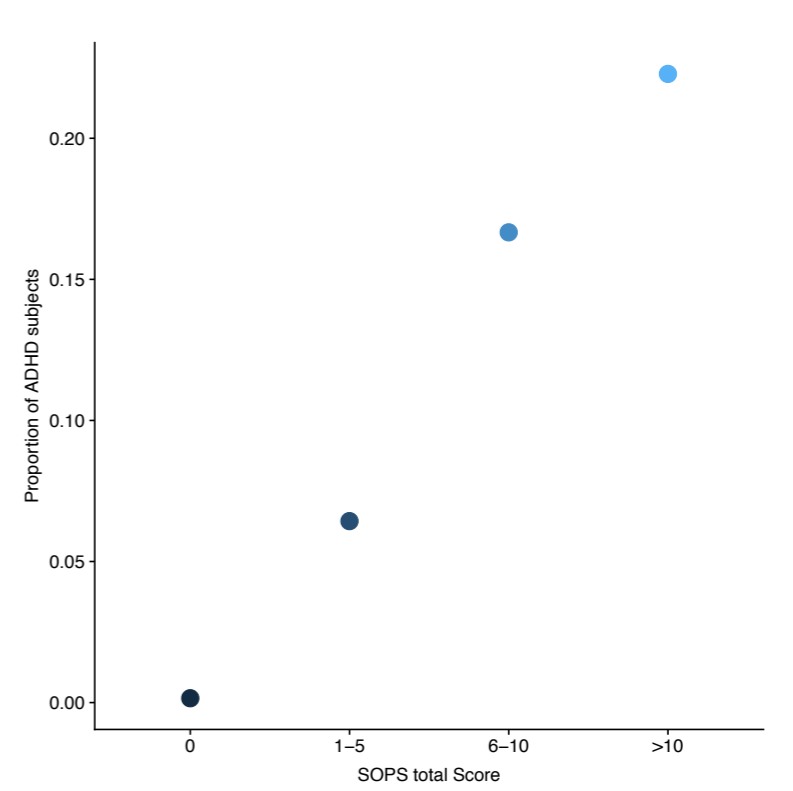

**EA****AA****All****A**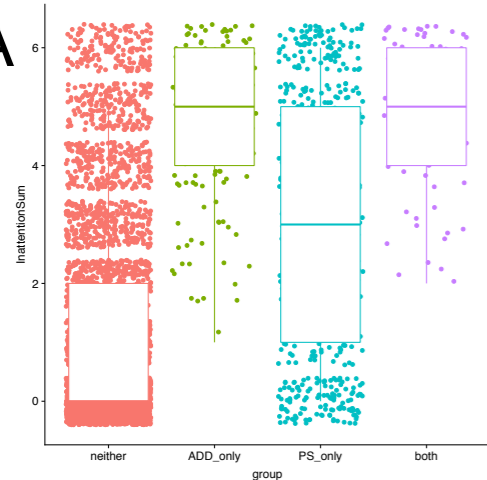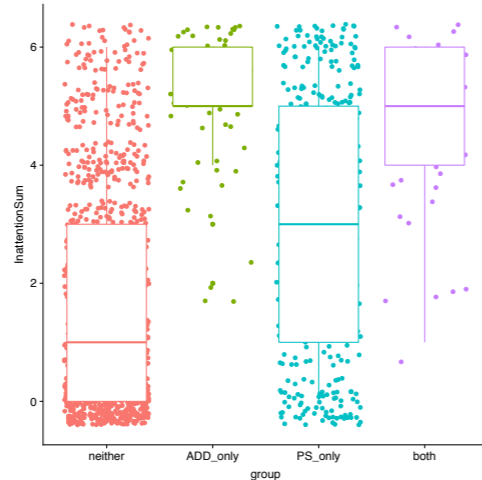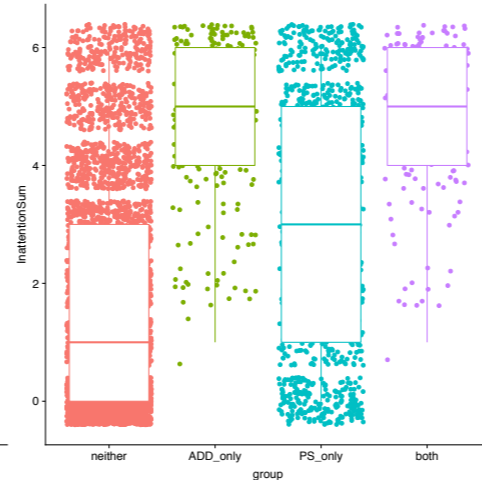**B**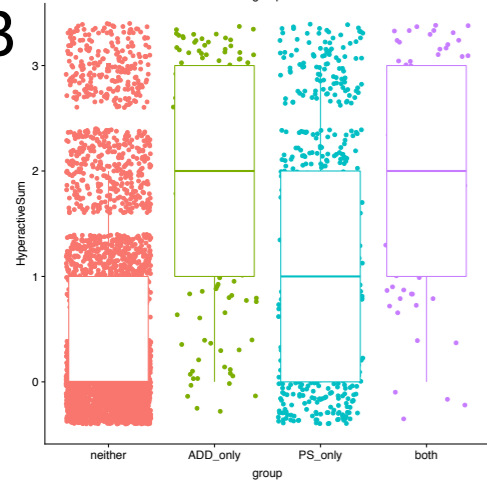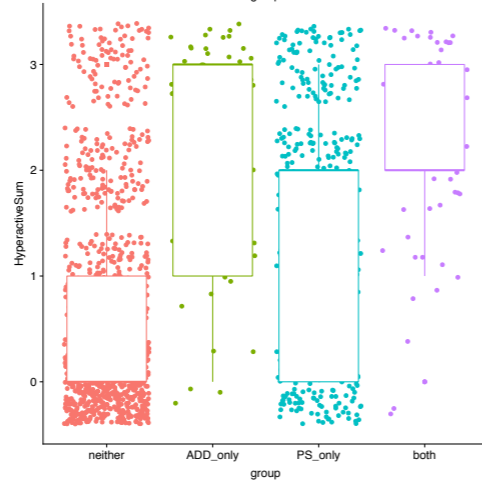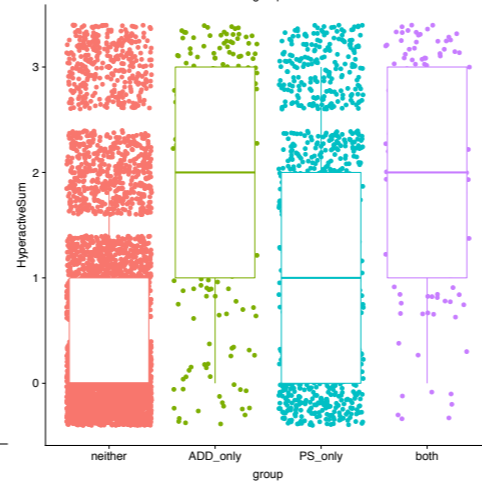**C**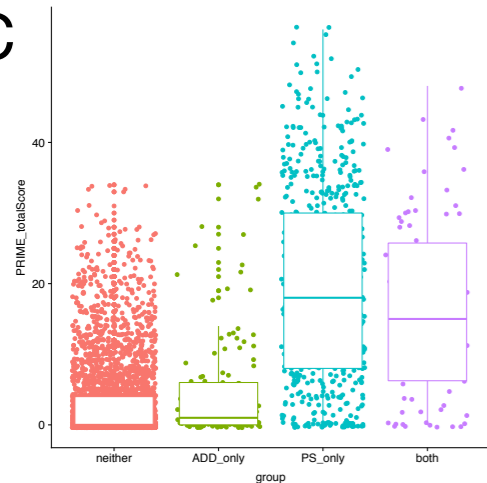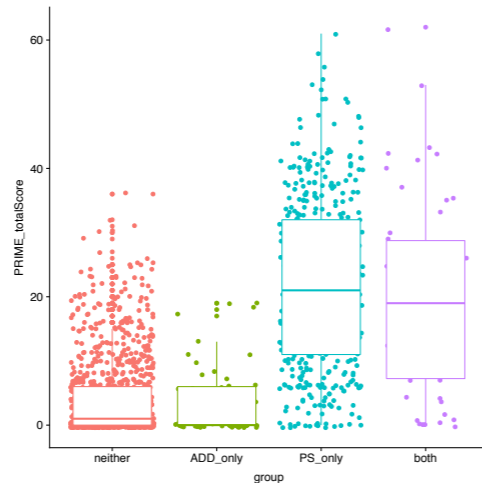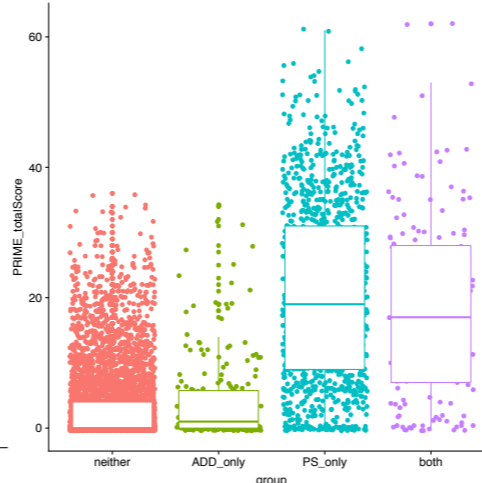**D**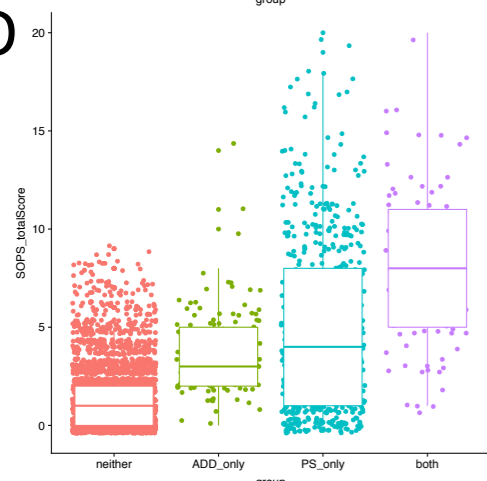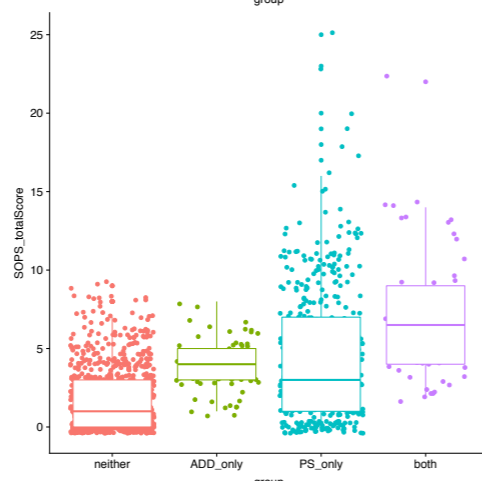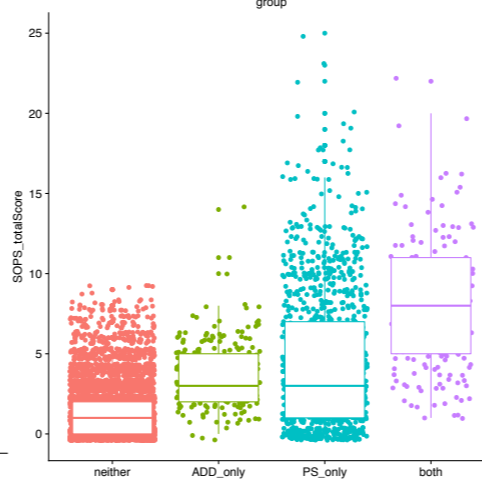

Supplement: 41398_2021_1203_MOESM2_ESM.pdf [file 41398_2021_1203_MOESM2_ESM.pdf]
